# Supplementary material for: Evaluation of 17 microsatellite markers for parentage testing and individual identification of domestic yak (Bos grunniens)
Source: PeerJ. 2018 Nov 12;6:e5946. doi: 10.7717/peerj.5946 (PMC6237114; doi:10.7717/peerj.5946)
Supplement: Supplemental Information 3 [file peerj-06-5946-s003.xlsx]

## Sheet: Sheet1
Talbe S3 Repeat number assignment for the 35 loci based on amplicon length.
Locus name	Length (bp)
TGLA57	219-229	219	221	223	225	227	229
		11	12	13	14	15	16
YAK11	306-314	306	308	310	312	314
		13	14	15	16	17
YAK07	323-339	323	325	327	329	331	333	335	337	339
		13	14	15	16	17	18	19	20	21
HEL6	247-265	247	249	251	253	255	257	259	261	263	265
		9	10	11	12	13	14	15	16	17	18
BM2113	115-133	115	117	119	121	123	125	127	129	131	133
		8	9	10	11	12	13	14	15	16	17
ILSTS030	150-156	150	152	154	156
		10	11	12	13
INRA023	184-204	184	186	188	190	192	194	196	198	200	202	204
		9	10	11	12	13	14	15	16	17	18	19
MGTG4B	245-255	245	247	249	251	253	255
		15	16	17	18	19	20
YAK08	321-343	321	323	325	327	329	331	333	335	337	339	341	343
		6	7	8	9	10	11	12	13	14	15	16	17
ILSTS006	162-170	162	164	166	168	170
		18	19	20	21	22
CSSM029	182-194	182	184	186	188	190	192	194
		14	15	16	17	18	19	20
ILSTS028	261-293	261	263	265	267	269	271	273	275	277	279	281	283	285	287	289	291	293
		8	9	10	11	12	13	14	15	16	17	18	19	20	21	22	23	24
BM2943	253	253
		10
ILSTS008	172-184	172	174	176	178	180	182	184
		7	8	9	10	11	12	13
POTCHA	128-148	128	130	132	134	136	138	140	142	144	146	148
		12	13	14	15	16	17	18	19	20	21	22
SPS115	231-261	231	233	235	237	239	241	243	245	247	249	251	253	255	257	259	261
		14	15	16	17	18	19	20	21	22	23	24	25	26	27	28	29
INRA035	104	104
		10
CSSM033	309-317	309	311	313	315	317
		8	9	10	11	12
INRA063	175-187	175	177	179	181	183	185	187
		12	13	14	15	16	17	18
TGLA227	210-222	210	212	214	216	218	220	222
		11	12	13	14	15	16	17
CSSME070	249-259	249	251	253	255	257	259
		9	10	11	12	13	14
HEL10	171-177	171	173	175	177
		14	15	16	17
TGLA126	209-223	209	211	213	215	217	219	221	223
		6	7	8	9	10	11	12	13
HEL5	214-228	214	216	218	220	222	224	226	228
		11	12	13	14	15	16	17	18
YAK12	259-279	259	261	263	265	267	269	271	273	275	277	279
		14	15	16	17	18	19	20	21	22	23	24
HAUT24	217-231	217	219	221	223	225	227	229	231
		13	14	15	16	17	18	19	20
CSSM041	128-134	128	130	132	134
		9	10	11	12
BM1818	239-251	239	241	243	245	247	249	251
		8	9	10	11	12	13	14
CSSM036	157-179	157	159	161	163	165	167	169	171	173	175	177	179
		10	11	12	13	14	15	16	17	18	19	20	21
MM12	109-121	109	111	113	115	117	119	121
		3	4	5	6	7	8	9
INRA005	186-202	186	188	190	192	194	196	198	200	202
		10	11	12	13	14	15	16	17	18
BM720	160-168	160	162	164	166	168
		13	14	15	16	17
RM099	233	233
		6
INRA037	296-312	296	298	300	302	304	306	308	310	312
		11	12	13	14	15	16	17	18	19
CSSM013	156-160	156	158	160
		8	9	10
Note: For each locus, the first line corresponds to bp and the second to inferred n of repeats.
