# Supplementary material for: Evaluation of 17 microsatellite markers for parentage testing and individual identification of domestic yak (Bos grunniens)
Source: PeerJ. 2018 Nov 12;6:e5946. doi: 10.7717/peerj.5946 (PMC6237114; doi:10.7717/peerj.5946)
Supplement: Supplemental Information 5 [file peerj-06-5946-s005.xlsx]

## Sheet: Sheet1
Table S5 Genotype distributions of the 35 loci.
BM720			BM1818			BM2113			BM2943			CSSM013			CSSM029			CSSM033			CSSM036			CSSM041			CSSME070			HAUT24			HEL5			HEL6			HEL10			ILSTS006			ILSTS008			ILSTS028
Genotypes	Obs.	Expected	Genotypes	Obs.	Expected	Genotypes	Obs.	Expected	Genotypes	Obs.	Expected	Genotypes	Obs.	Expected	Genotypes	Obs.	Expected	Genotypes	Obs.	Expected	Genotypes	Obs.	Expected	Genotypes	Obs.	Expected	Genotypes	Obs.	Expected	Genotypes	Obs.	Expected	Genotypes	Obs.	Expected	Genotypes	Obs.	Expected	Genotypes	Obs.	Expected	Genotypes	Obs.	Expected	Genotypes	Obs.	Expected	Genotypes	Obs.
13 , 13	1	2.8273	8 , 8	1	0.82	8 , 8	5	9.6918	10 , 10	236	236	8 , 8	157	155.976	14 , 14	0	0.3662	8 , 8	0	0.1949	10 , 10	0	0.0021	9 , 9	1	1.5054	9 , 9	0	0.0077	13 , 13	1	0.0781	11 , 11	192	192.197	9 , 9	0	0.0029	14 , 14	71	23.9176	18 , 18	0	0.0022	7 , 7	0	0.257	8 , 8	0
14 , 13	36	30.823	11 , 8	25	22.6551	10 , 8	0	0.6253				9 , 8	59	62.8806	16 , 14	3	4.1092	11 , 8	14	13.0707	12 , 10	0	0.0299	10 , 9	32	28.2355	11 , 9	0	0.0386	14 , 13	1	2.8113	12 , 11	29	27.1338	10 , 9	0	0.1341	15 , 14	2	93.731	19 , 18	2	1.3823	9 , 7	0	0.0685	13 , 8	1
14 , 14	84	82.0959	11 , 11	150	150.495	10 , 10	0	0.0067				9 , 9	9	6.2388	16 , 16	7	10.8137	11 , 11	202	203.062	12 , 12	0	0.0448	10 , 10	124	128.546	11 , 11	1	0.0257	14 , 14	20	22.3341	12 , 12	0	0.9236	10 , 10	8	0.7376	15 , 15	137	90.9002	19 , 19	109	110.238	9 , 9	0	0.0021	13 , 13	3
15 , 13	11	11.42	12 , 8	1	3.5835	11 , 8	8	6.0443				10 , 8	10	8.1663	17 , 14	0	0.2848	12 , 8	0	0.5396	13 , 10	0	0.9126	11 , 9	3	3.9872	12 , 9	0	1.5116	15 , 13	0	0.0195	13 , 11	0	1.8089	11 , 9	0	0.8163	16 , 14	5	2.5857	20 , 18	0	0.0605	10 , 7	1	0.137	14 , 8	0
15 , 14	53	61.0533	12 , 11	47	47.7375	11 , 10	0	0.1929				10 , 9	0	1.6418	17 , 16	0	1.5139	12 , 11	18	16.8051	13 , 12	4	3.194	11 , 10	38	36.409	12 , 11	3	2.5193	15 , 14	0	0.3124	13 , 12	0	0.1274	11 , 10	0	9.3878	16 , 15	3	5.0325	20 , 19	9	9.676	10 , 9	0	0.0171	14 , 13	0
15 , 15	14	11.2004	12 , 12	5	3.7115	11 , 11	1	0.9002				10 , 10	0	0.0959	17 , 17	0	0.045	12 , 12	0	0.3276	13 , 13	50	48.5949	11 , 11	2	2.5182	12 , 12	50	49.126	15 , 15	0	0	13 , 13	1	0.0021	11 , 11	32	28.3673	16 , 16	0	0.0607	20 , 20	1	0.1965	10 , 10	0	0.0128	14 , 14	0
16 , 13	0	1.5522	13 , 8	0	0.0607	12 , 8	1	2.918							18 , 14	15	13.2634				14 , 10	0	0.0299	12 , 9	1	2.7666	13 , 9	3	1.419	16 , 13	1	0.8785	15 , 11	3	2.7134	12 , 9	2	0.4431	17 , 14	0	4.8482	22 , 18	0	0.5529	11 , 7	6	7.6403	15 , 8	0
16 , 14	6	8.2985	13 , 11	0	0.8091	12 , 10	1	0.0931							18 , 16	81	70.5054				14 , 12	2	0.1045	12 , 10	29	25.2634	13 , 11	0	2.365	16 , 14	13	14.0564	15 , 12	0	0.1911	12 , 10	1	5.0962	17 , 15	11	9.436	22 , 19	91	88.4665	11 , 9	2	0.955	15 , 13	13
16 , 15	6	3.0746	13 , 12	1	0.128	12 , 11	1	0.9002							18 , 17	7	4.8865				14 , 13	1	3.194	12 , 11	4	3.5675	13 , 12	92	92.7095	16 , 15	1	0.0976	15 , 13	0	0.0127	12 , 11	36	31.0204	17 , 16	0	0.2603	22 , 20	3	3.8704	11 , 10	1	1.9101	15 , 14	0
16 , 16	1	0.194	13 , 13	0	0	12 , 12	1	0.2018							18 , 18	106	113.437				14 , 14	0	0.0448	12 , 12	0	1.2013	13 , 13	44	43.2802	16 , 16	3	2.1475	15 , 15	0	0.0064	12 , 12	8	8.309	17 , 17	2	0.2278	22 , 22	17	17.5551	11 , 11	51	53.0043	15 , 15	16
17 , 13	3	2.5501	14 , 8	0	0.0607	13 , 8	55	49.3969							19 , 14	0	0.0407				15 , 10	0	0.0341				14 , 9	0	0.0154	17 , 13	5	4.6074	16 , 11	2	1.8089	13 , 9	0	0.2682							12 , 7	9	7.5717	16 , 8	1
17 , 14	15	13.6333	14 , 11	1	0.8091	13 , 10	2	1.5765							19 , 16	0	0.2163				15 , 12	0	0.1194				14 , 11	0	0.0257	17 , 14	84	73.718	16 , 12	0	0.1274	13 , 10	3	3.0845							12 , 9	0	0.9465	16 , 13	10
17 , 15	5	5.0512	14 , 12	0	0.128	13 , 11	14	15.2395							19 , 17	0	0.015				15 , 13	2	3.6503				14 , 12	1	1.0077	17 , 15	0	0.5119	16 , 13	0	0.0085	13 , 11	21	18.7755							12 , 10	2	1.8929	16 , 14	0
17 , 16	0	0.6866	14 , 13	0	0.0022	13 , 12	7	7.357							19 , 18	1	0.6981				15 , 14	0	0.1194				14 , 13	1	0.946	17 , 16	23	23.0369	16 , 15	0	0.0127	13 , 12	9	10.1924							12 , 11	112	105.531	16 , 15	13
17 , 17	0	0.5394	14 , 14	0	0	13 , 13	63	62.0089							19 , 19	0	0				15 , 15	0	0.0597				14 , 14	0	0.0026	17 , 17	57	60.1518	16 , 16	0	0.0021	13 , 13	2	3.0175							12 , 12	48	52.0557	16 , 16	6
						14 , 8	4	3.3348							20 , 14	1	0.5696				16 , 10	1	0.5586							18 , 13	0	0.2148	18 , 11	8	8.1401	14 , 9	0	0.1866							13 , 7	0	0.0685	17 , 8	0
						14 , 10	0	0.1064							20 , 16	3	3.0278				16 , 12	0	1.9552							18 , 14	2	3.436	18 , 12	1	0.5732	14 , 10	2	2.1458							13 , 9	0	0.0086	17 , 13	6
						14 , 11	0	1.0288							20 , 17	0	0.2099				16 , 13	64	59.774							18 , 15	0	0.0239	18 , 13	0	0.0382	14 , 11	12	13.0612							13 , 10	0	0.0171	17 , 14	1
						14 , 12	1	0.4967							20 , 18	10	9.773				16 , 14	1	1.9552							18 , 16	0	1.0738	18 , 15	0	0.0573	14 , 12	4	7.0904							13 , 11	0	0.955	17 , 15	8
						14 , 13	6	8.408							20 , 19	0	0.03				16 , 15	3	2.2345							18 , 17	2	5.6312	18 , 16	0	0.0382	14 , 13	5	4.2915							13 , 12	2	0.9465	17 , 16	7
						14 , 14	1	0.2661							20 , 20	0	0.1949				16 , 16	20	18.1557							18 , 18	3	0.1193	18 , 18	0	0.0764	14 , 14	3	1.4461							13 , 13	0	0.0021	17 , 17	2
						16 , 8	16	11.4634													17 , 10	0	0.0043							19 , 13	0	0.2928				15 , 9	0	0.07										18 , 8	0
						16 , 10	0	0.3659													17 , 12	0	0.0149							19 , 14	4	4.6855				15 , 10	0	0.8047										18 , 13	4
						16 , 11	4	3.5366													17 , 13	0	0.4563							19 , 15	0	0.0325				15 , 11	1	4.898										18 , 14	1
						16 , 12	1	1.7073													17 , 14	0	0.0149							19 , 16	1	1.4642				15 , 12	4	2.6589										18 , 15	4
						16 , 13	25	28.9024													17 , 15	0	0.0171							19 , 17	8	7.679				15 , 13	3	1.6093										18 , 16	5
						16 , 14	2	1.9512													17 , 16	0	0.2793							19 , 18	0	0.3579				15 , 14	2	1.1195										18 , 17	4
						16 , 16	3	3.2927													17 , 17	0	0							19 , 19	1	0.2278				15 , 15	1	0.1924										18 , 18	0
						17 , 8	0	0.8337													19 , 10	0	0.2473							20 , 13	0	0.0195				16 , 9	0	0.0758										19 , 8	0
						17 , 10	0	0.0266													19 , 12	0	0.8657							20 , 14	0	0.3124				16 , 10	1	0.8717										19 , 13	15
						17 , 11	0	0.2572													19 , 13	25	26.4648							20 , 15	0	0.0022				16 , 11	6	5.3061										19 , 14	0
						17 , 12	0	0.1242													19 , 14	1	0.8657							20 , 16	0	0.0976				16 , 12	4	2.8805										19 , 15	21
						17 , 13	2	2.102													19 , 15	2	0.9893							20 , 17	0	0.5119				16 , 13	1	1.7434										19 , 16	12
						17 , 14	1	0.1419													19 , 16	14	16.2004							20 , 18	1	0.0239				16 , 14	1	1.2128										19 , 17	18
						17 , 16	1	0.4878													19 , 17	1	0.1237							20 , 19	0	0.0325				16 , 15	0	0.4548										19 , 18	6
						17 , 17	0	0.0133													19 , 19	4	3.5245							20 , 20	0	0				16 , 16	0	0.2274										19 , 19	15
																					20 , 10	1	0.1706																									20 , 8	0
																					20 , 12	1	0.597																									20 , 13	2
																					20 , 13	18	18.2516																									20 , 14	3
																					20 , 14	2	0.597																									20 , 15	3
																					20 , 15	1	0.6823																									20 , 16	7
																					20 , 16	8	11.1727																									20 , 17	4
																					20 , 17	0	0.0853																									20 , 18	3
																					20 , 19	5	4.9467																									20 , 19	8
																					20 , 20	2	1.6631																									20 , 20	2
																					21 , 10	0	0.0085																									21 , 8	0
																					21 , 12	0	0.0299																									21 , 13	0
																					21 , 13	0	0.9126																									21 , 14	0
																					21 , 14	0	0.0299																									21 , 15	0
																					21 , 15	0	0.0341																									21 , 16	0
																					21 , 16	0	0.5586																									21 , 17	1
																					21 , 17	0	0.0043																									21 , 18	0
																					21 , 19	2	0.2473																									21 , 19	0
																					21 , 20	0	0.1706																									21 , 20	0
																					21 , 21	0	0.0021																									21 , 21	0
																																																24 , 8	0
																																																24 , 13	0
																																																24 , 14	0
																																																24 , 15	0
																																																24 , 16	0
																																																24 , 17	0
																																																24 , 18	0
																																																24 , 19	2
																																																24 , 20	0
																																																24 , 21	0
																																																24 , 24	0
[truncated: 55 more columns]
